# Supplementary material for: Different Periampullary Types and Subtypes Leading to Different Perioperative Outcomes of Pancreatoduodenectomy: Reality and Not a Myth; An International Multicenter Cohort Study
Source: MDPI journal article supplement (doi:10.3390/cancers16050899), 2024-02-23
Supplement: s1 [file s1]

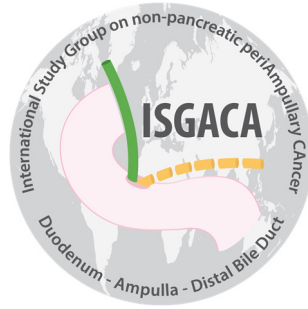

# **Different Periampullary Types and Subtypes Leading to Different Perioperative Outcomes of Pancreatoduodenectomy: Reality and Not a Myth; An International Multicenter Cohort Study**

## **SUPPLEMENTARY FILE**

**Bas A. Uijterwijk <sup>1,2,3</sup>, Daniël H. Lemmers <sup>1,2,3</sup>, Giuseppe Kito Fusai <sup>4</sup>, Bas Groot Koerkamp <sup>5</sup>, Sharnice Koek <sup>6</sup>, Alessandro Zerbi <sup>7</sup>, Ernesto Sparrelid <sup>8</sup>, Ugo Boggi <sup>9</sup>, Misha Luyer <sup>10</sup>, Benedetto Ielpo <sup>11</sup>, Roberto Salvia <sup>12</sup>, Brian K. P. Goh <sup>13,14</sup>, Geert Kazemier <sup>15</sup>, Bergthor Björnsson <sup>16</sup>, Mario Serradilla-Martín <sup>17</sup>, Michele Mazzola <sup>18</sup>, Vasileios K. Mavroeidis <sup>19,20</sup>, Santiago Sánchez-Cabús <sup>21</sup>, Patrick Pessaux <sup>22</sup>, Steven White <sup>23</sup>, Adnan Alseidi <sup>24</sup>, Raffaele Dalla Valle <sup>25</sup>, Dimitris Korkolis <sup>26</sup>, Louisa R. Bolm <sup>27</sup>, Zahir Soonawalla <sup>20</sup>, Keith J. Roberts <sup>28</sup>, Miljana Vladimirov <sup>29</sup>, Alessandro Mazzotta <sup>30</sup>, Jorg Kleeff <sup>31</sup>, Miguel Angel Suarez Muñoz <sup>32</sup>, Marc G. Besselink <sup>2</sup> and Mohammed Abu Hilal <sup>1,\*</sup> on behalf of ISGACA Consortium**

**Supplementary figure S1:**

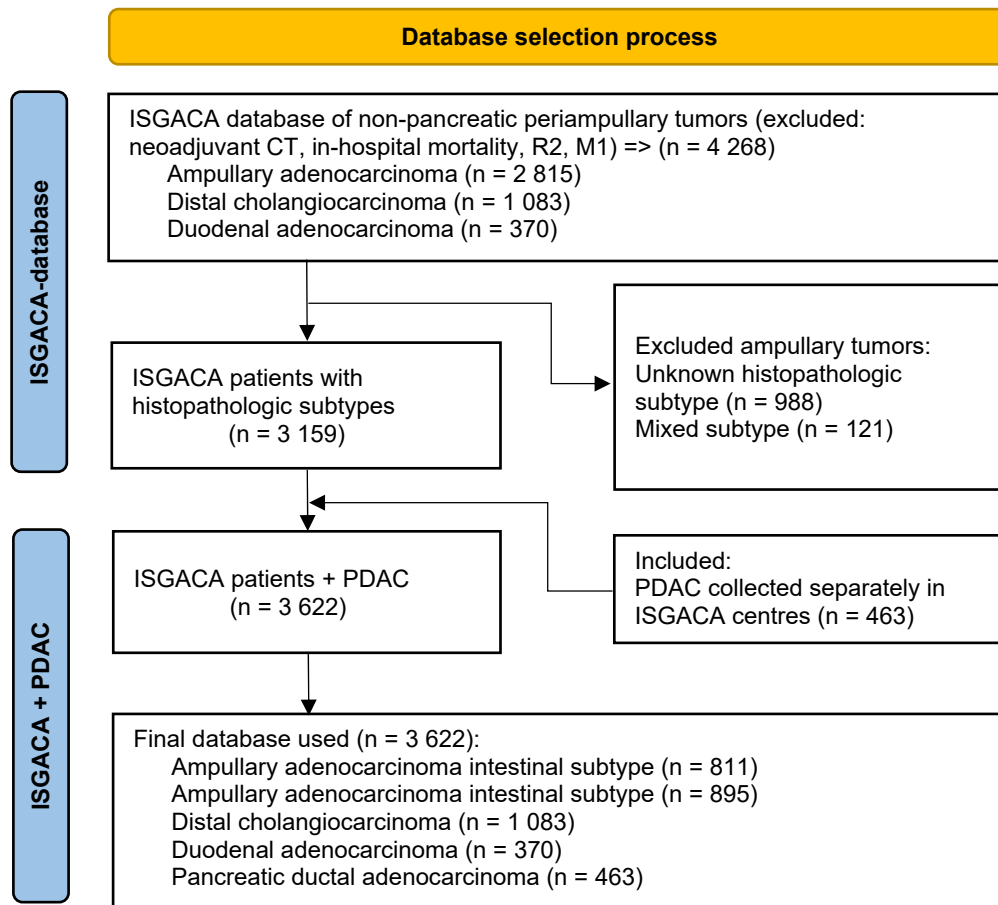

**Supplementary Figure S1:** Data selection process

**Supp Table S1:** Post-operative outcomes

|                         | DAC         | P (DAC vs AmpIT) | AmpIT       | P (AmpIT vs AmpPB) | AmpPB      | P (AmpPB vs dCCA) | dCCA        | P (dCCA vs PDAC) | PDAC       | P total          |
|-------------------------|-------------|------------------|-------------|--------------------|------------|-------------------|-------------|------------------|------------|------------------|
| <i>Mortality, n (%)</i> | 22 (5.9)    | 0.305            | 36 (4.3)    | 0.470              | 47 (5.2)   | 0.120             | 39 (3.7)    | <b>0.043</b>     | 6 (1.5)    | <b>0.013</b>     |
| <i>CR-POPF, n (%)</i>   | 89 (27.3)   | 0.605            | 138 (25.5)  | <b>0.004</b>       | 124 (18.5) | <b>&lt;0.001</b>  | 211 (27.6)  | <b>&lt;0.001</b> | 38 (8.3)   | <b>&lt;0.001</b> |
| <i>CR-PPH, n (%)</i>    | 30 (12.6)   | 0.086            | 40 (8.2)    | 0.371              | 40 (6.6)   | <b>0.008</b>      | 70 (11.1)   | 0.422            | 3 (6.2)    | <b>0.018</b>     |
| <i>CR-BL, n (%)</i>     | 22 (6.7)    | 0.766            | 33 (6.0)    | 0.998              | 38 (5.9)   | 0.438             | 66 (7.0)    | <b>0.018</b>     | 17 (3.7)   | 0.171            |
| <i>CR-DGE, n (%)</i>    | 31 (15.1)   | 1.000            | 56 (15.3)   | 0.732              | 68 (14.3)  | <b>0.030</b>      | 47 (9.5)    | <b>&lt;0.001</b> | 6 (1.9)    | <b>&lt;0.001</b> |
| <i>Hospital stay §</i>  | 15 [11, 24] | <b>0.002</b>     | 14 [10, 21] | 0.527              | 14 [9, 20] | <b>0.004</b>      | 15 [10, 24] | <b>&lt;0.001</b> | 11 [8, 17] | <b>&lt;0.001</b> |

Abbreviations: DAC, Duodenal adenocarcinoma; AmpIT, Ampullary adenocarcinoma subtype intestinal; AmpPB, Ampullary adenocarcinoma subtype pancreatobiliary; PDAC, Pancreatic ductal adenocarcinoma; P, P-value; Mortality, <30 days or in-hospital mortality; Hospital stay, Length of hospital stay in days; §, (median [IQR]); Bold values corresponds with <0.05 significance; CR-POPF, Clinically relevant postoperative pancreatic fistula ISGPS Grade B/C; CR-PPH, Clinically relevant post-pancreatectomy hemorrhage ISGPS grade B/C; CR-BL, Clinically relevant bile leakage; Length of hospital stay, reported in days.
